# Supplementary material for: Characterizing the origins of dissolved organic carbon in coastal seawater using stable carbon isotope and light absorption characteristics
Source: Copernicus journal article supplement (doi:10.5194/bg-18-1793-2021), 2021-03-16
Supplement: Supplementary file 1 [file bg-18-1793-2021-supplement.pdf]

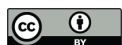

*Supplement of*

**Characterizing the origins of dissolved organic carbon in coastal seawater using stable carbon isotope and light absorption characteristics**

**Heejun Han et al.**

*Correspondence to:* Guebuem Kim (gkim@snu.ac.kr)

The copyright of individual parts of the supplement might differ from the article licence.

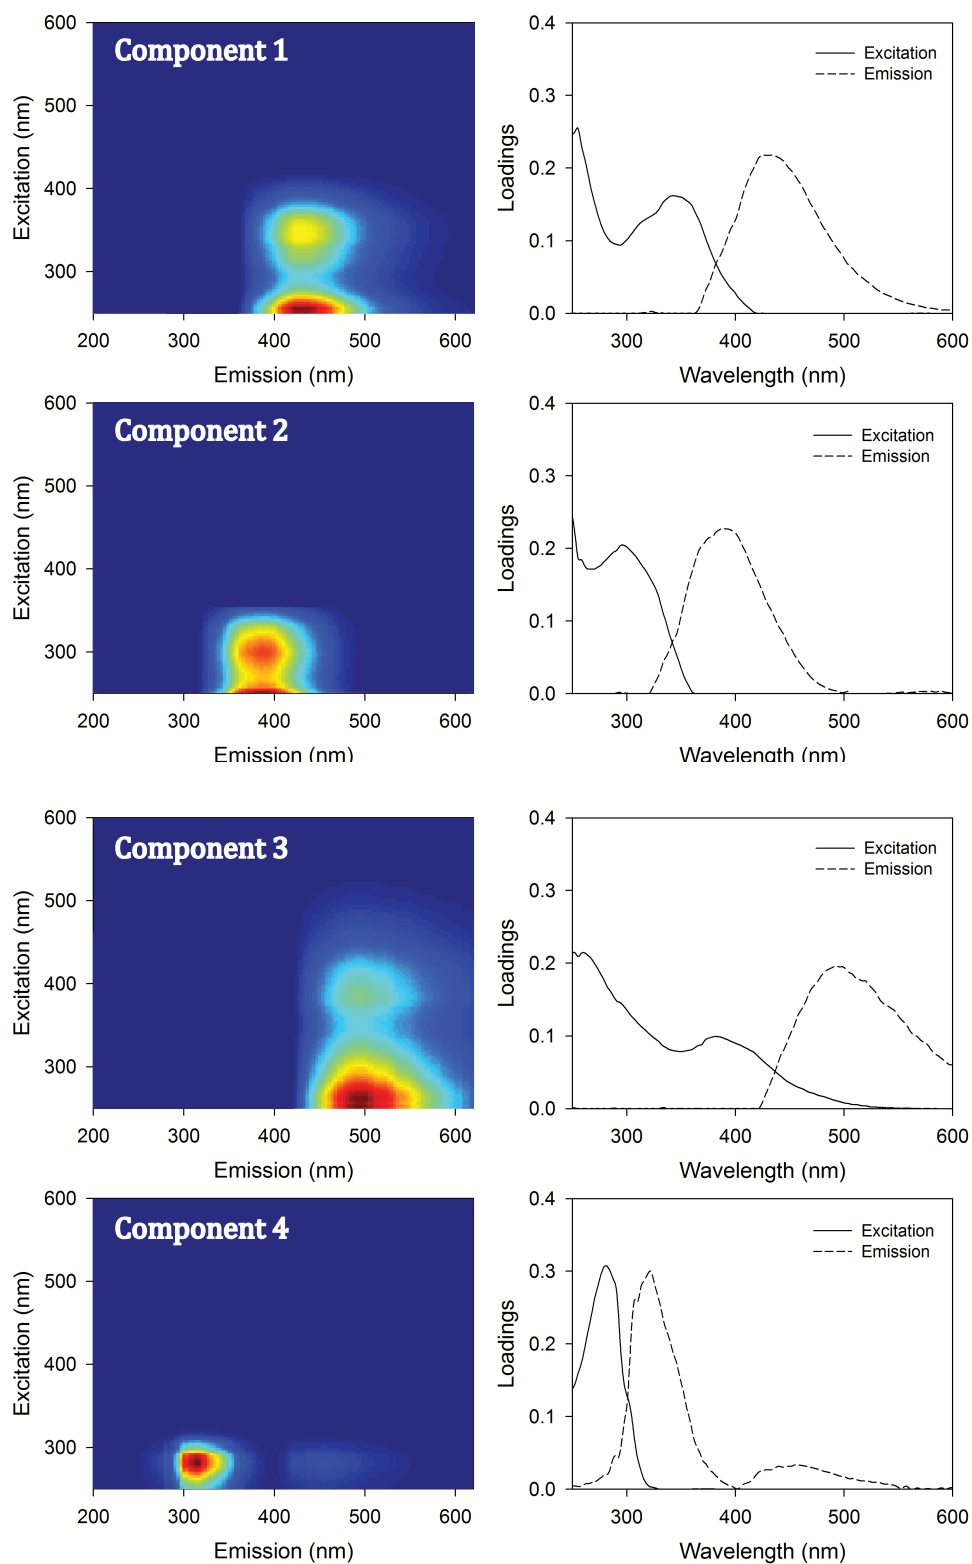

**Figure S1. Contour plots of fluorescence EEM spectra and excitation-emission loadings of terrestrial humic-like (FDOM<sub>C</sub> and FDOM<sub>A</sub>), marine humic-like (FDOM<sub>M</sub>), and protein-like (tryptophan-like; FDOM<sub>P</sub>) components identified using the PARAFAC model in Sihwa Lake.**
